# Supplementary material
Source: publisher figshare collection journal article supplement (https://sage.figshare.com/ndownloader/files/22116156)

Appendix A

| Table 2 |  |
| --- | --- |
| Descriptive statistics: Researcher Interviews | |
| Variables | *Percentage/Years* |
| Sample size | 30 |
| Percentage men | 24% |
| Percentage women | 76% |
| Average age | 43 |
| Age Range | 33-59 |
| Average years as a single parent | 8.5 |
| Range of years as a single parent | 3-13 |
| Average age youngest child | 10.1 |
| Age range youngest child | 0-22 |

| Table 3 |  |
| --- | --- |
| Descriptive statistics: Student interviews | |
| Variables | *Percentage/Years* |
| Sample size | 244 |
| Percentage men | 19% |
| Percentage women | 81% |
| Average age | 44 |
| Age Range | 25 – 63 |
| Average years as a single parent | 6.64 |
| Range of years as a single parent | 0 – 25 |
| Average age youngest child | 11.97 |
| Age range youngest child | 0-24 |

Figure 1. Ego Network Perspective


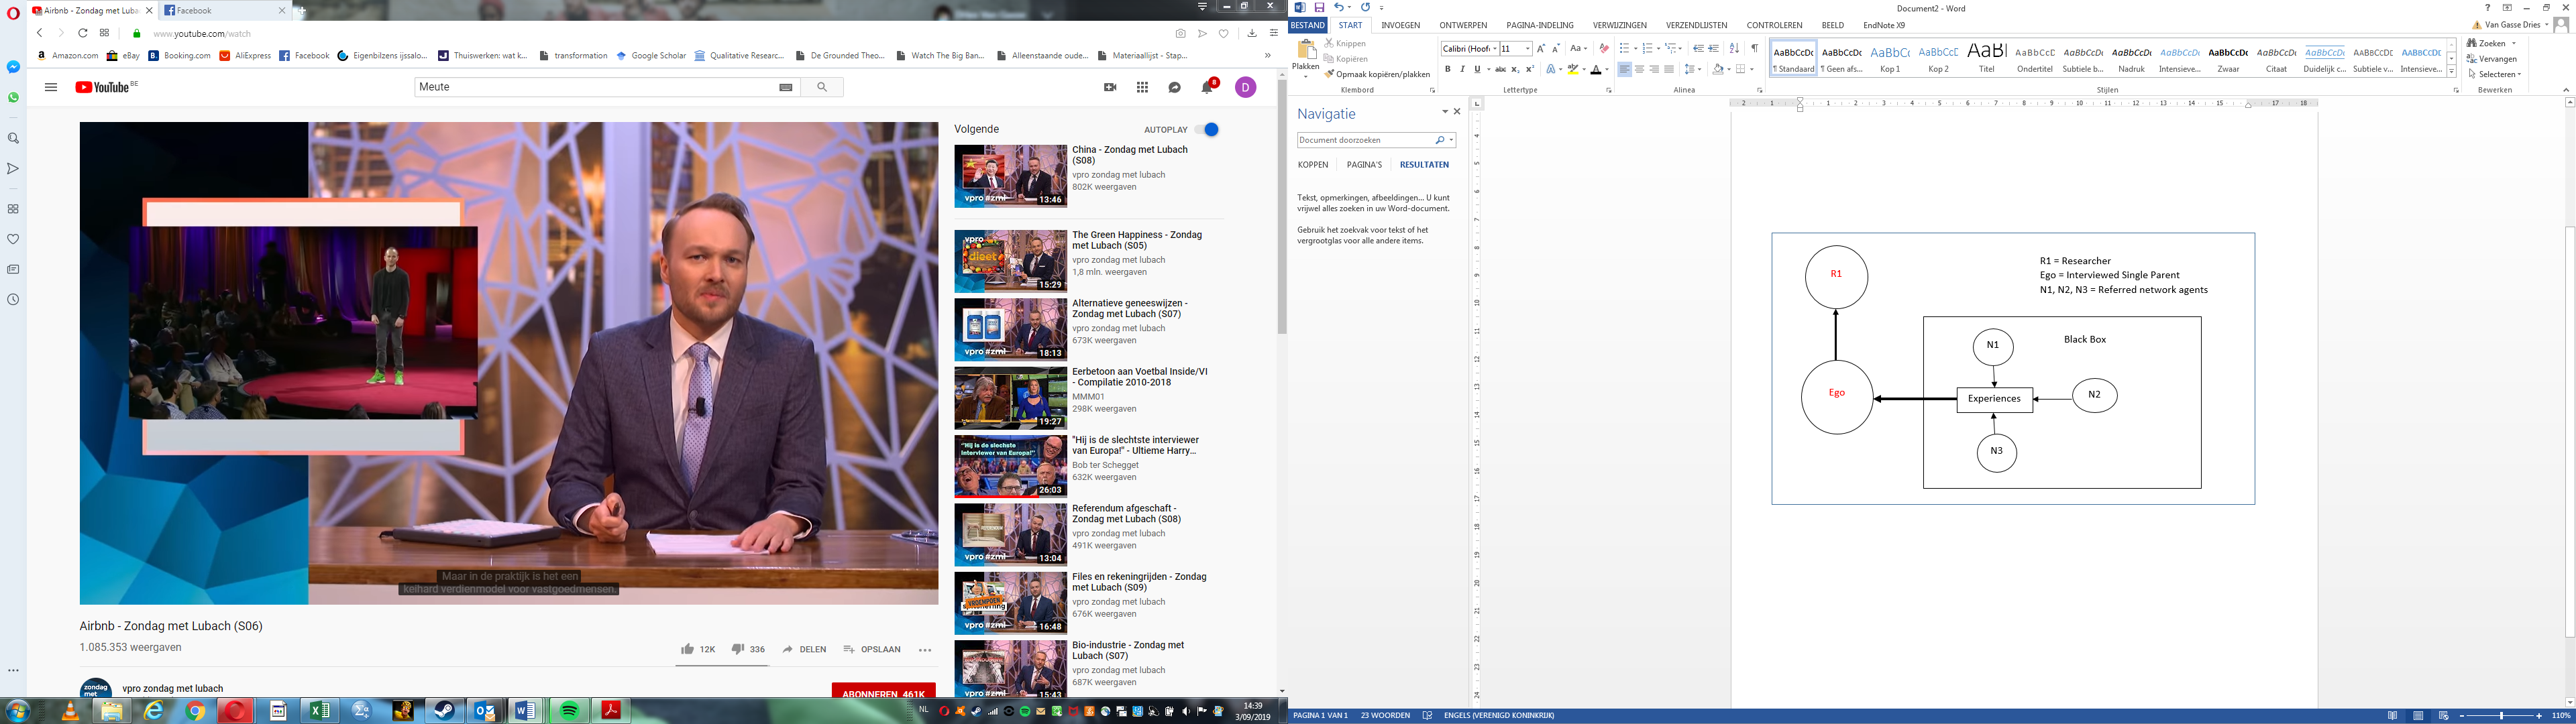


Figure 2: Process of Analysis


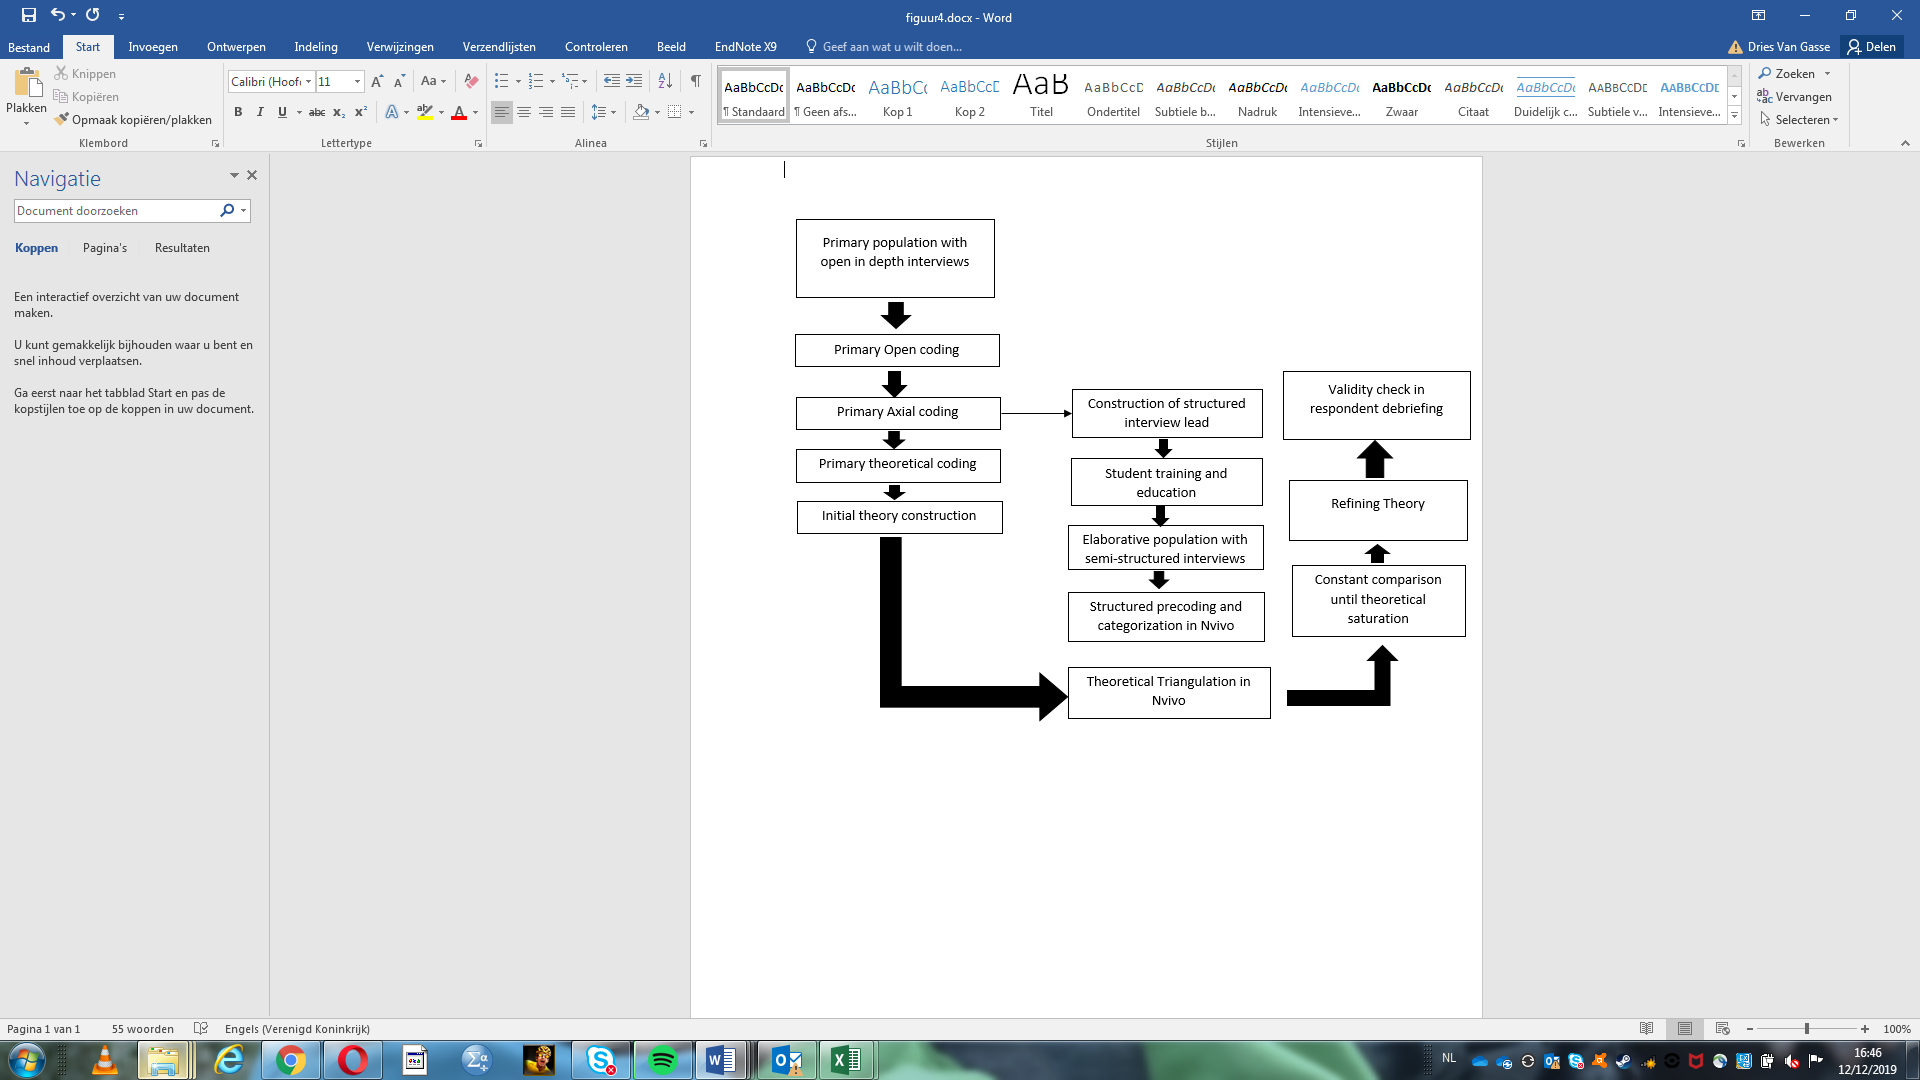

Supplement: Supplementary file 1 [file 22116156]
